# Supplementary material
Source: PubMed Central journal article supplement (PMC2670869)
Supplement: emboj200941s6.pdf [file emboj200941s6.pdf]

**Supplementary Tables**

**Supplementary Table 1**

| <b>Structure without DNA</b> |                                                                                                                                                                                                |                                              |
|------------------------------|------------------------------------------------------------------------------------------------------------------------------------------------------------------------------------------------|----------------------------------------------|
| <b>Model number</b>          | <b>Model obtained after:</b>                                                                                                                                                                   | <b>Correlation coefficient after fitting</b> |
| Model 0                      | Initial model: composite structure without the N-terminus (residues 1-46) obtained after the superposition of the catalytic core of the following structures CC+Nter, CC+Cter, CC+IBD of LEDGF |                                              |
| Model 1                      | 1 mode fitting, use of 30% of the amplitudes, regularization with Refmac                                                                                                                       | 0.531                                        |
| Model 2                      | 1 mode fitting, use of 50% of the amplitudes, regularization with Refmac                                                                                                                       | 0.564                                        |
| Model 3                      | 1 mode fitting, use of 100% of the amplitudes, manually fitting of the N-terminus, regularization with Refmac                                                                                  | 0.738                                        |
| Model 4                      | Rigid body N-terminus fitting, use 100% of the amplitudes, regularization with Refmac                                                                                                          | 0.821                                        |
| Model 5                      | 12 modes fitting in model masked EM map, use 100% of the amplitudes, regularization with Refmac, generate the two fold symmetric related molecule.                                             | 0.830                                        |

Detailed fitting procedure in the structure without DNA. When one normal mode is used, it is the lowest frequency mode (mode 7). Frequency modes 7 to 18 are used in the 12 modes fitting. The correlation coefficient are calculated as defined in (Navaza *et al.*, 2002)

**Supplementary Table 2**

| <b>Structure with DNA</b> |                                                                                                             |                                              |
|---------------------------|-------------------------------------------------------------------------------------------------------------|----------------------------------------------|
| <b>Model number</b>       | <b>Model obtained after:</b>                                                                                | <b>Correlation coefficient after fitting</b> |
| Model 4                   | Initial model obtained from the structure without DNA at the step 4                                         | -                                            |
| Model 6                   | 1 modes fitting in model masked EM map, use 30% of the amplitudes, regularization with Refmac               | 0.471                                        |
| Model 7                   | 1 modes fitting in model masked EM map, use 50% of the amplitudes, regularization with Refmac               | 0.481                                        |
| Model 8                   | 12 modes fitting in model masked EM map, use 100% of the amplitudes, regularization with Refmac             | 0.550                                        |
| Model 9                   | Rigid body N-terminus fitting, use 100% of the amplitudes, regularization with Refmac                       | 0.772                                        |
| Model 10                  | Manually fitting of the DNA molecules in the empty density remaining in the top region using difference map | -                                            |

Detailed fitting procedure in the structure with DNA. When one normal mode is used, it is the lowest frequency mode (mode 7). Frequency modes 7 to 18 are used in the 12 modes fitting. The correlation coefficient are calculated as defined in (Navaza *et al.*, 2002)

**Supplementary Table 3**

| <b>Structure</b> | <b>Superposition of the catalytic core domain of :</b> | <b>Domain</b> | <b>Translation (Å)</b> | <b>Rotation (°)</b> |
|------------------|--------------------------------------------------------|---------------|------------------------|---------------------|
| Without DNA      | model 0 – model 5                                      | Nter A        | 23.61                  | 133.58              |
|                  |                                                        | Nter B        | -44.75                 | -163.59             |
|                  |                                                        | Cter A        | 3.12                   | 12.62               |
|                  |                                                        | Cter B        | -2.14                  | -5.88               |
| With DNA         | model 4 – model 9                                      | Nter A        | 16.44                  | 30.21               |
|                  |                                                        | Nter B        | -12.16                 | -51.02              |
|                  |                                                        | Cter A        | 15.78                  | -36.84              |
|                  |                                                        | Cter B        | 4.25                   | 37.23               |

Movement of the Cter and Nter domains after superposition of the catalytic core domains.
